# Supplementary material for: Essential Oils as Nematicides in Plant Protection—A Review
Source: MDPI journal article supplement (doi:10.3390/plants12061418), 2023-03-22
Supplement: s1 [file s1]

# SUPPLEMENTARY MATERIAL

**Table S1. Nematode classification (family, genus, and species) of the species studied in documents downloaded for the systematic analysis. The classification includes the putative level, c-p, and feeding group of nematodes studied. The classification data have been taken from the Nemaplex database (<http://nemaplex.ucdavis.edu>), a free virtual Encyclopedia on soil and plant nematodes.**

| Nematode family  | Nematode genus           | Nematode species     | Putative Feeding | c-p group | Feeding group | References                                                                                                                                                                                                                                                                                                                                                                                                                                                                                                                                |
|------------------|--------------------------|----------------------|------------------|-----------|---------------|-------------------------------------------------------------------------------------------------------------------------------------------------------------------------------------------------------------------------------------------------------------------------------------------------------------------------------------------------------------------------------------------------------------------------------------------------------------------------------------------------------------------------------------------|
| Anguinidae       | <i>Ditylenchus</i>       | <i>D. dipsaci</i>    | plant feeder     | 2         | 1             | Zouhar et al. (2009)                                                                                                                                                                                                                                                                                                                                                                                                                                                                                                                      |
| Aphelenchoididae | <i>Bursaphelenchus</i>   | <i>B. xylophilus</i> | plant feeder     | 2         | 1             | Park et al. (2005); Kong et al. (2007); Park et al. 2007; Elbadri et al. (2008); Kim et al. (2008); Kong et al. (2009); Barbosa et al. 2010; Faria et al. (2013)                                                                                                                                                                                                                                                                                                                                                                          |
| Criconematidae   | <i>Criconemella</i> spp. |                      | plant feeder     | 3         | 1             | Abd-Elgawa and Omer (1995)                                                                                                                                                                                                                                                                                                                                                                                                                                                                                                                |
| Heteroderidae    | <i>Meloidogyne</i> spp.  |                      | plant feeder     | 3         | 1             | Madalosso et al. (2017); Ntalli et al. (2020)                                                                                                                                                                                                                                                                                                                                                                                                                                                                                             |
| Heteroderidae    | <i>Meloidogyne</i>       | <i>M. incognita</i>  | plant feeder     | 3         | 1             | Pandey et al. 2000; Ibrahim et al. (2006); Romero et al. (2006); Meyer et al. (2008); Abu Elyosur (2009); Cetintas and Jarbas (2010); Ntalli et al. (2010); Ntalli et al. (2011); Caboni et al. (2013); Quin Lin et al. (2013); Laquale et al. (2015); Avato et al. (2017); Sendi and Khosravi (2017); Laquale et al. (2018); Jardim et al. (2018); Barros et al. (2019); Elo et al. (2019); Kalaiselvia et al. (2019); D'Addabbo et al. (2020); Jardim et al. (2020); Pardavella et al. (2020); Dutta et al. (2021); Kundu et al. (2021) |
| Heteroderidae    | <i>Meloidogyne</i>       | <i>M. javanica</i>   | plant feeder     | 3         | 1             | Oka et al. (2000); Onifade et al. (2008); Ntalli et al. (2011); Sosa et al. (2012); Mattei et al. (2013); Santana et al. (2014); Sousa et al. (2015); Andres et al. (2017); Julio et al. (2017); Massuh et al. (2017); Borges et al. (2018); Navarro-Rocha et al. (2020); Pardavella et al. (2020); Basaid et al. (2021); Galitseo et al. (2022)                                                                                                                                                                                          |

|                 |                           |                       |           |   |   |                                                 |
|-----------------|---------------------------|-----------------------|-----------|---|---|-------------------------------------------------|
|                 |                           |                       | plant     |   |   |                                                 |
| Heteroderidae   | <i>Meloidogyne</i>        | <i>M. chitwoodi</i>   | feeder    | 3 | 1 | Faria et al. (2016)                             |
|                 |                           |                       | plant     |   |   |                                                 |
| Heteroderidae   | <i>Meloidogyne</i>        | <i>M. arenaria</i>    | feeder    | 3 | 1 | Walker and Melin (1996); Caboni et al. (2014)   |
|                 |                           |                       | plant     |   |   |                                                 |
| Heteroderidae   | <i>Meloidogyne</i>        | <i>M. artiellia</i>   | feeder    | 3 | 1 | Perez et al. (2003)                             |
|                 |                           |                       | plant     |   |   |                                                 |
| Heteroderidae   | <i>Meloidogyne</i>        | <i>M. graminicola</i> | feeder    | 3 | 1 | Chavan et al. (2019)                            |
|                 |                           |                       | plant     |   |   |                                                 |
| Hoplolaimidae   | <i>Rotylenchulus</i>      | <i>R. reniformis</i>  | feeders   | 3 | 1 | Abd-Elgawa and Omer (1995)                      |
|                 |                           |                       | plant     |   |   |                                                 |
| Hoplolaimidae   | <i>Hoplolaimus</i> spp.   |                       | feeder    | 3 | 1 | Abd-Elgawa and Omer (1995)                      |
|                 |                           |                       | bacterial |   |   |                                                 |
| Panagrolaimidae | <i>Panagrolaimus</i> spp. |                       | feeder    | 1 | 3 | Oro et al. (2020)                               |
|                 |                           |                       | plant     |   |   |                                                 |
| Pratylenchidae  | <i>Pratylenchus</i>       | <i>P. vulnus</i>      | feeder    | 3 | 1 | Avato et al. (2017); Laquale et al. (2018)      |
|                 |                           |                       | plant     |   |   |                                                 |
| Pratylenchidae  | <i>Nacobbus</i>           | <i>N. aberrans</i>    | feeder    | 3 | 1 | Sosa et al. (2020)                              |
|                 |                           |                       | plant     |   |   |                                                 |
| Pratylenchidae  | <i>Pratylenchus</i>       | <i>P. brachyurus</i>  | feeder    | 3 | 1 | Mattei et al. (2013)                            |
|                 |                           |                       | bacterial |   |   |                                                 |
| Rhabditidae     | <i>Caenorhabditis</i>     | <i>C. elegans</i>     | feeder    | 3 | 1 | Satyal et al. (2012); Kalaiselvia et al. (2019) |
|                 |                           |                       | plant     |   |   |                                                 |
| Longidoridae    | <i>Xiphinema</i>          | <i>X. index</i>       | feeder    | 5 | 1 | Avato et al. (2021)                             |
